# Supplementary material for: Identification, Genetic Analysis, and Pathogenicity of Classical Swine H1N1 and Human-Swine Reassortant H1N1 Influenza Viruses from Pigs in China
Source: MDPI journal article supplement (doi:10.3390/v12010055), 2020-01-02

# **Identification, Genetic Analysis and Pathogenicity of Classical Swine H1N1 and Human-Swine Reassortant H1N1 Influenza Viruses from Pigs in China**

**Yafen Song<sup>1</sup>, Yong Zhang<sup>1</sup>, Bing Zhang<sup>1</sup>, Ling Chen<sup>1</sup>, Min Zhang<sup>1</sup>, Jingwen Wang<sup>1</sup>, Ying Jiang<sup>1</sup>, Chenghuai Yang<sup>1</sup>, Taozhen Jiang<sup>1\*</sup>**

<sup>1</sup> China Institute of Veterinary Drug Control, Beijing 100081, China

\* Taozhen Jiang is the Corresponding author:

Dr. Taozhen Jiang, China Institute of Veterinary Drug Control, 8 Nandajie, Zhongguancun, Haidian District, Beijing, 100081, China.

Tel: (+86) 010-62103518; Fax: (+86) 010-61255380; E-mail:

taozhen\_jiang@163.com

**Table S1. The nucleotide homology between the AV1522 virus and the A/swine/Hubei/02/2008(H1N1) virus, when analyzing each gene fragment.**

| <b>virus</b>                       | <b>gene</b> | <b>virus with similarity</b> | <b>Homology (%)</b> |
|------------------------------------|-------------|------------------------------|---------------------|
| A/swine/Shandong/AV1522/2011(H1N1) | HA          | A/swine/Hubei/02/2008(H1N1)  | 99.5                |
|                                    | NA          | A/swine/Hubei/02/2008(H1N1)  | 100                 |
|                                    | PB2         | A/swine/Hubei/02/2008(H1N1)  | 99.7                |
|                                    | PB1         | A/swine/Hubei/02/2008(H1N1)  | 99.9                |
|                                    | PA          | A/swine/Hubei/02/2008(H1N1)  | 99.6                |
|                                    | NP          | A/swine/Hubei/02/2008(H1N1)  | 99.5                |
|                                    | M           | A/swine/Hubei/02/2008(H1N1)  | 99.9                |
|                                    | NS          | A/swine/Hubei/02/2008(H1N1)  | 100                 |

**Figure S1. Phylogenetic analysis of the NA(A), PB2 (B), PB1 (C), PA (D), NP (E), M (F), and NS (G)genes.** The trees were constructed by using the neighbor-joining method with the Maximum Composite Likelihood model and MEGA version 4.0 with 1,000 bootstrap replicates. Our viruses were indicated by triangle marker “▲”.

**Figure S1A**

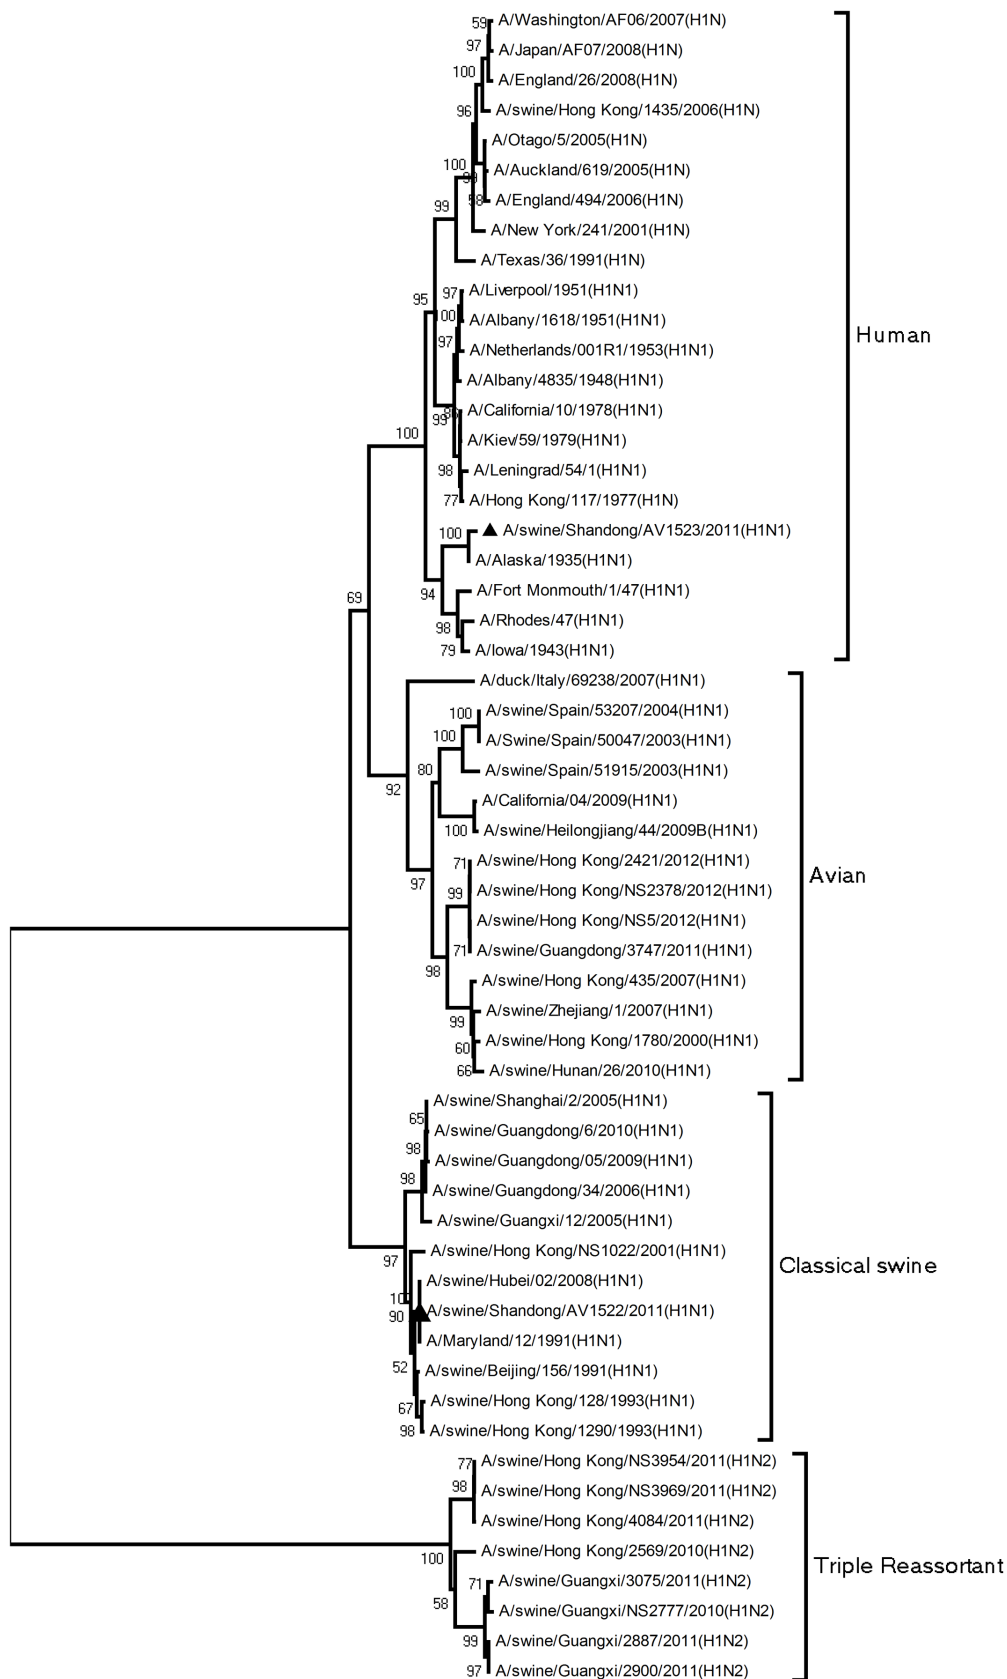

**Figure S1B**

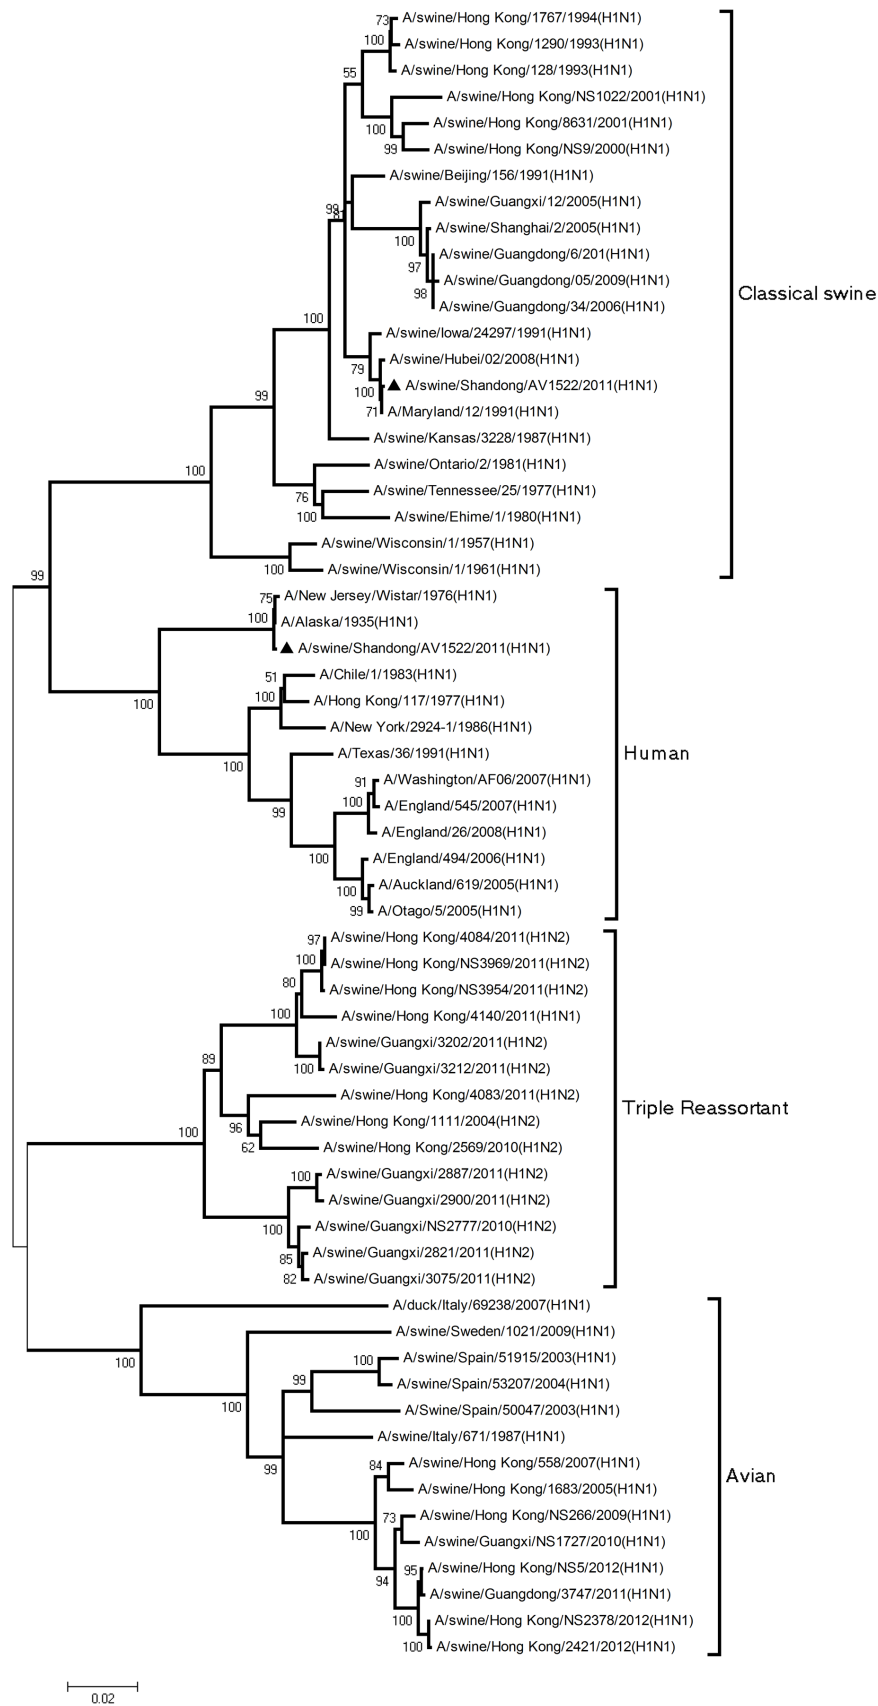

**Figure S1C**

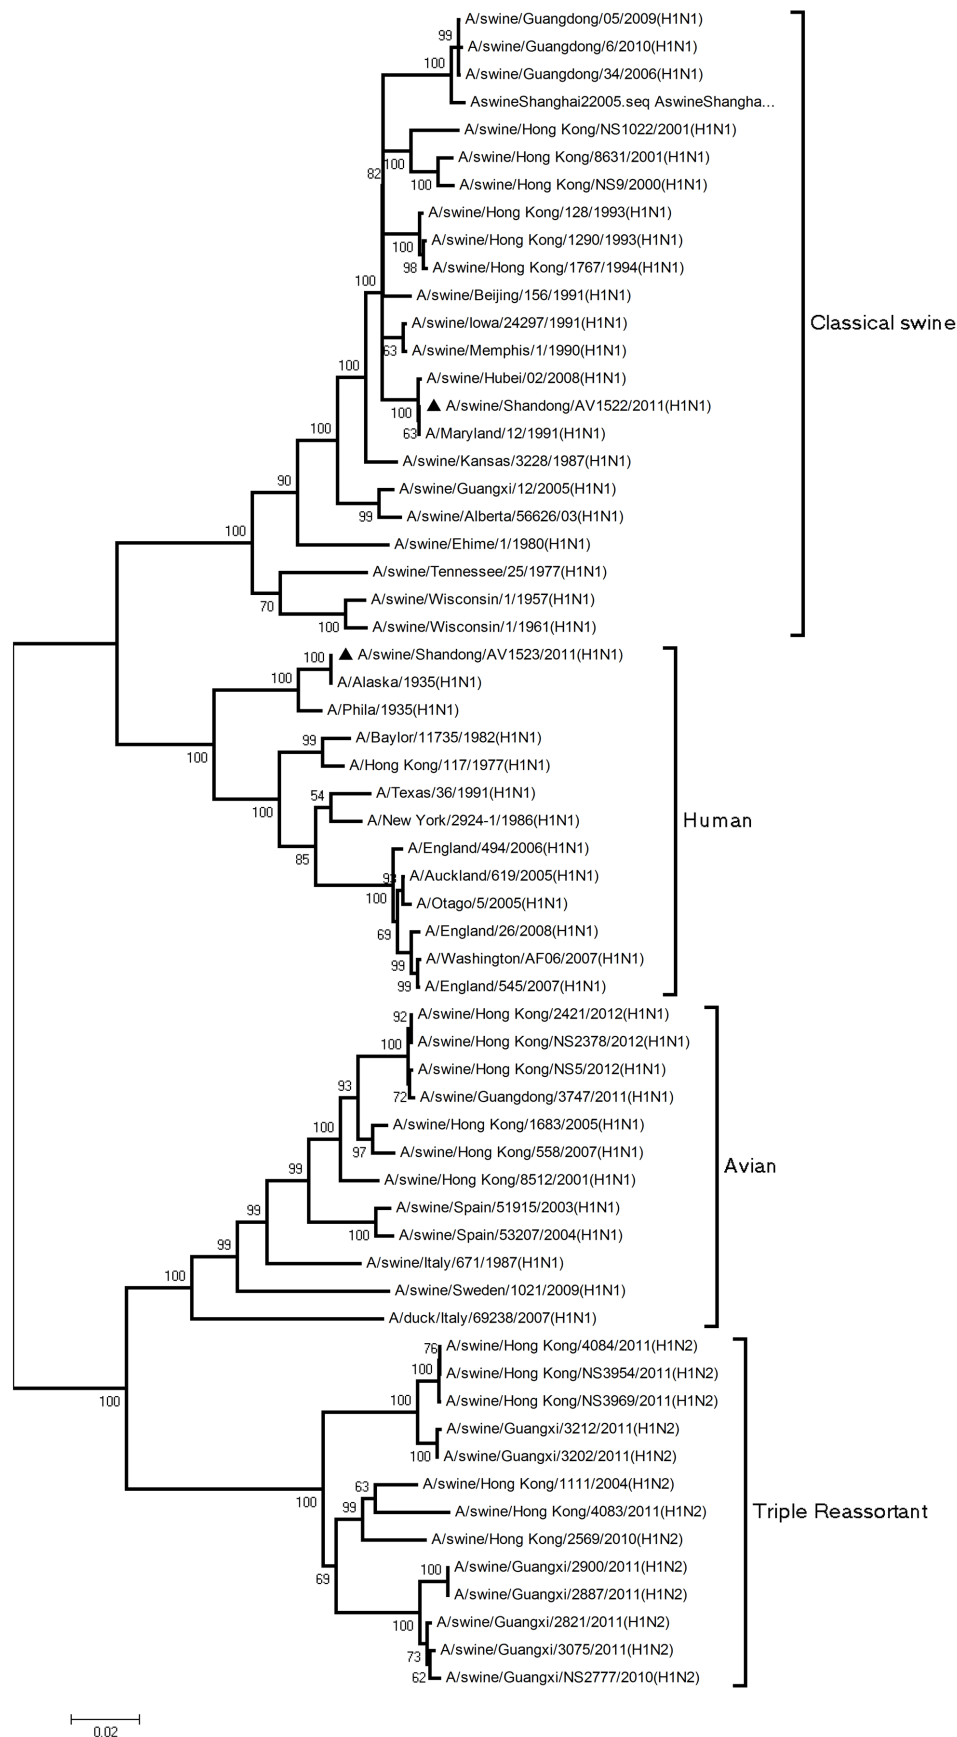

**Figure S1D**

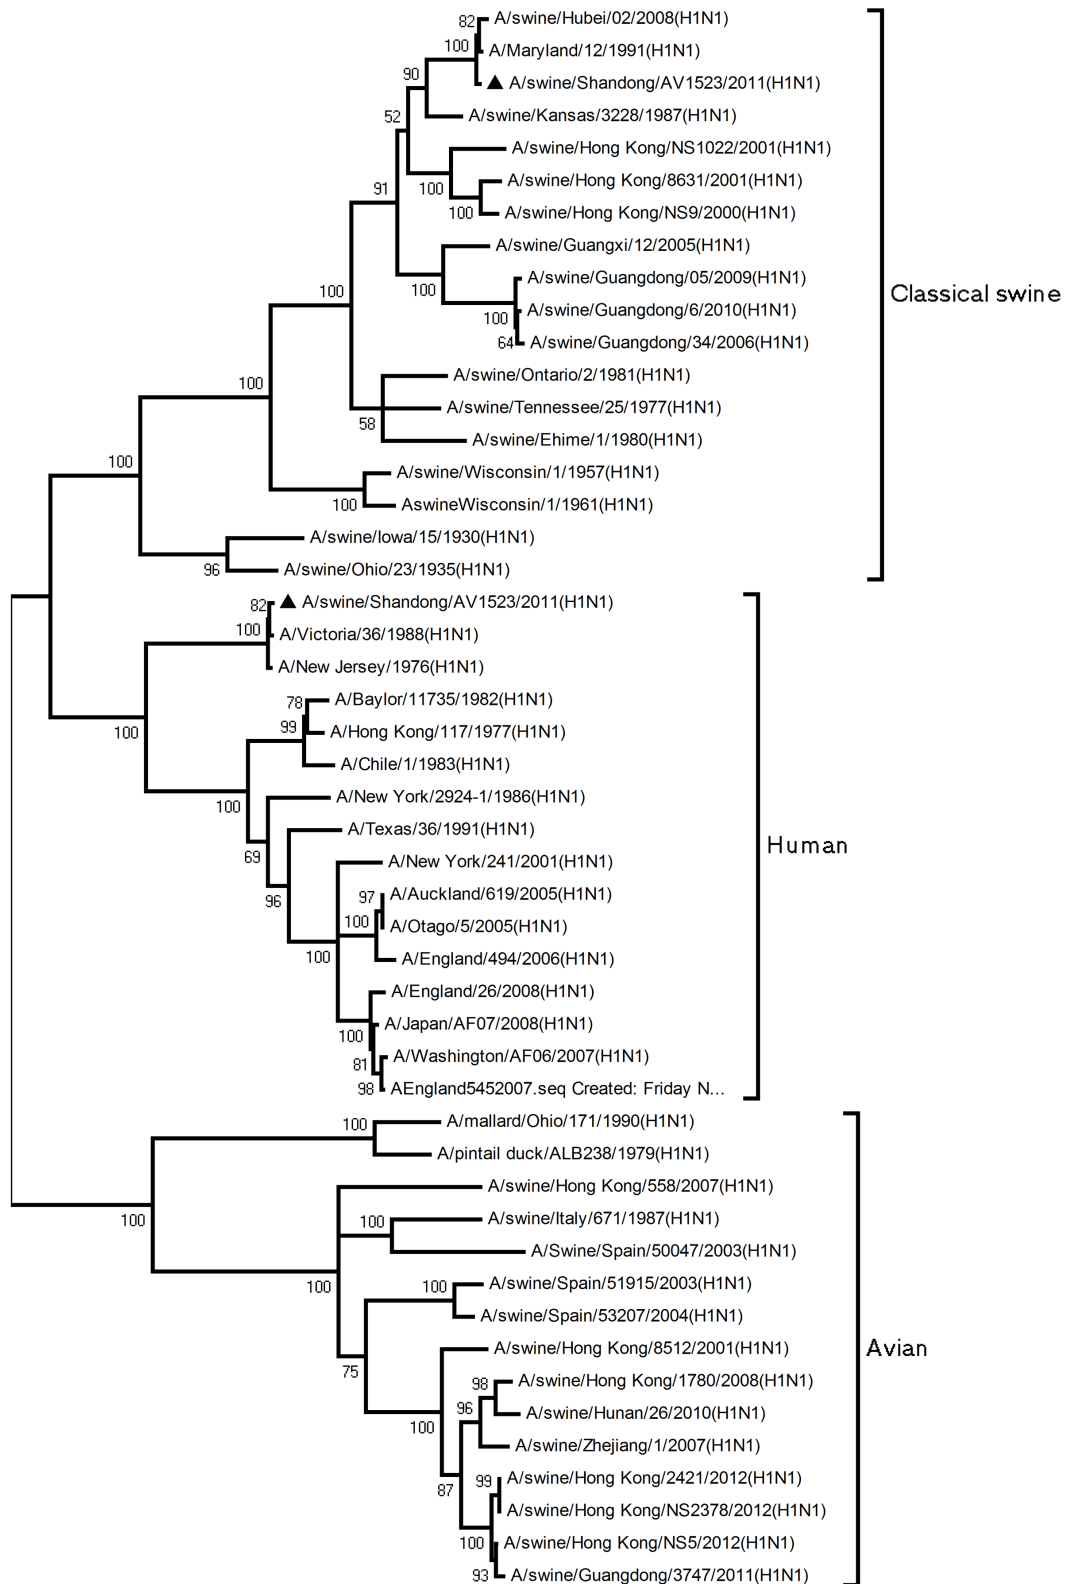

**Figure S1E**

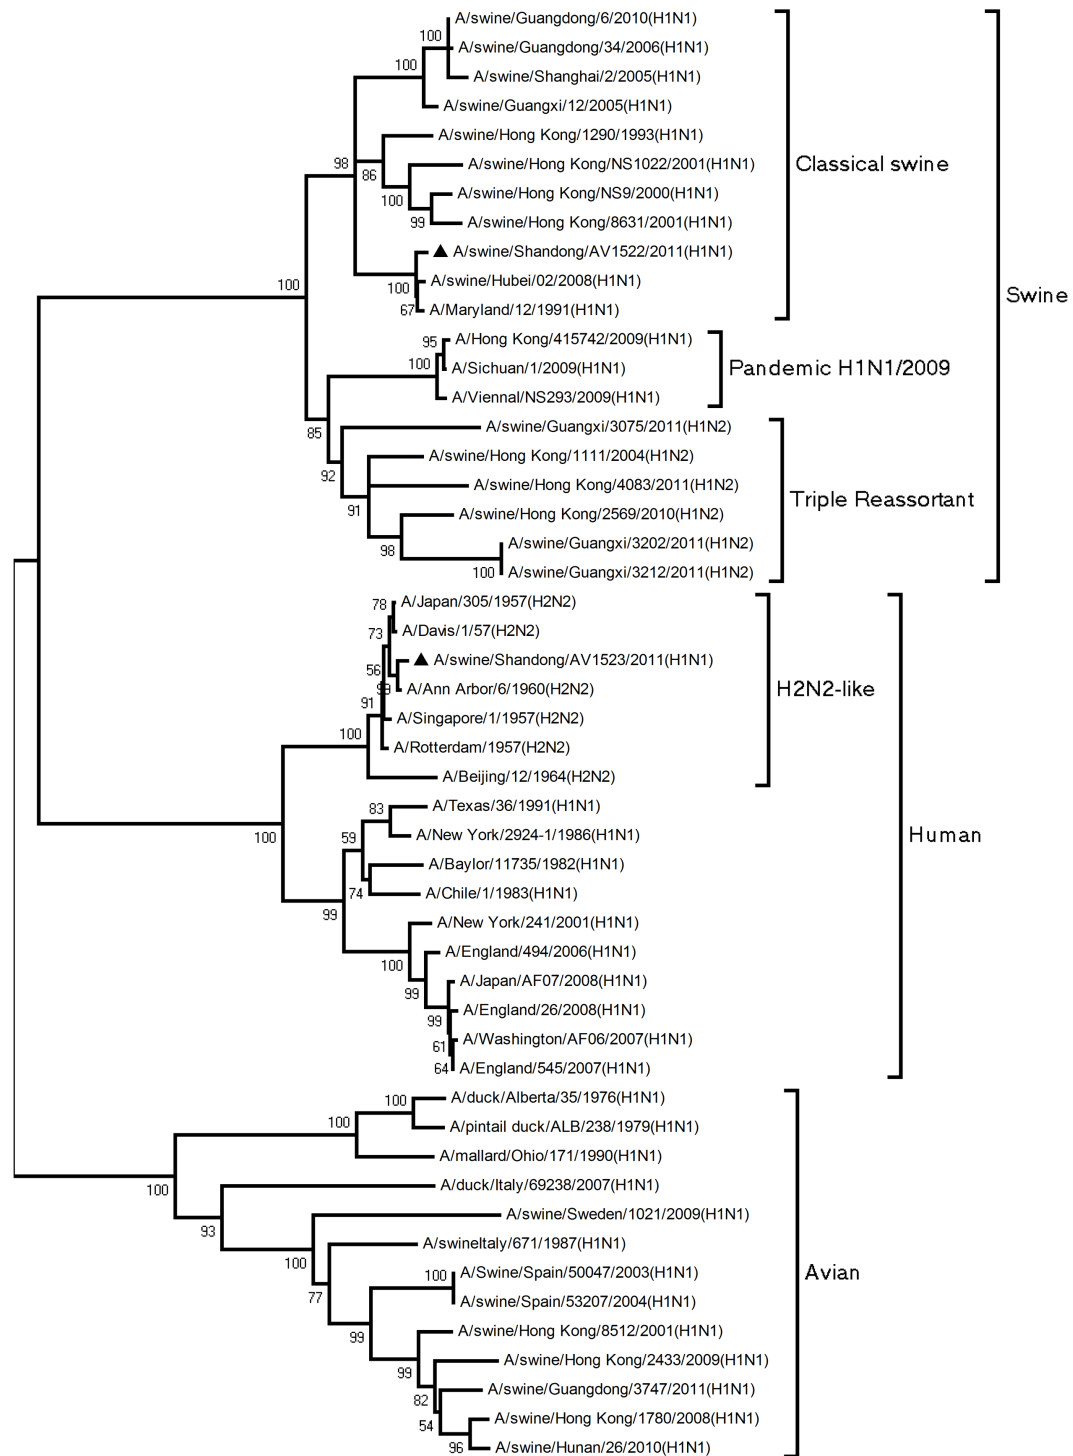



Figure S1F

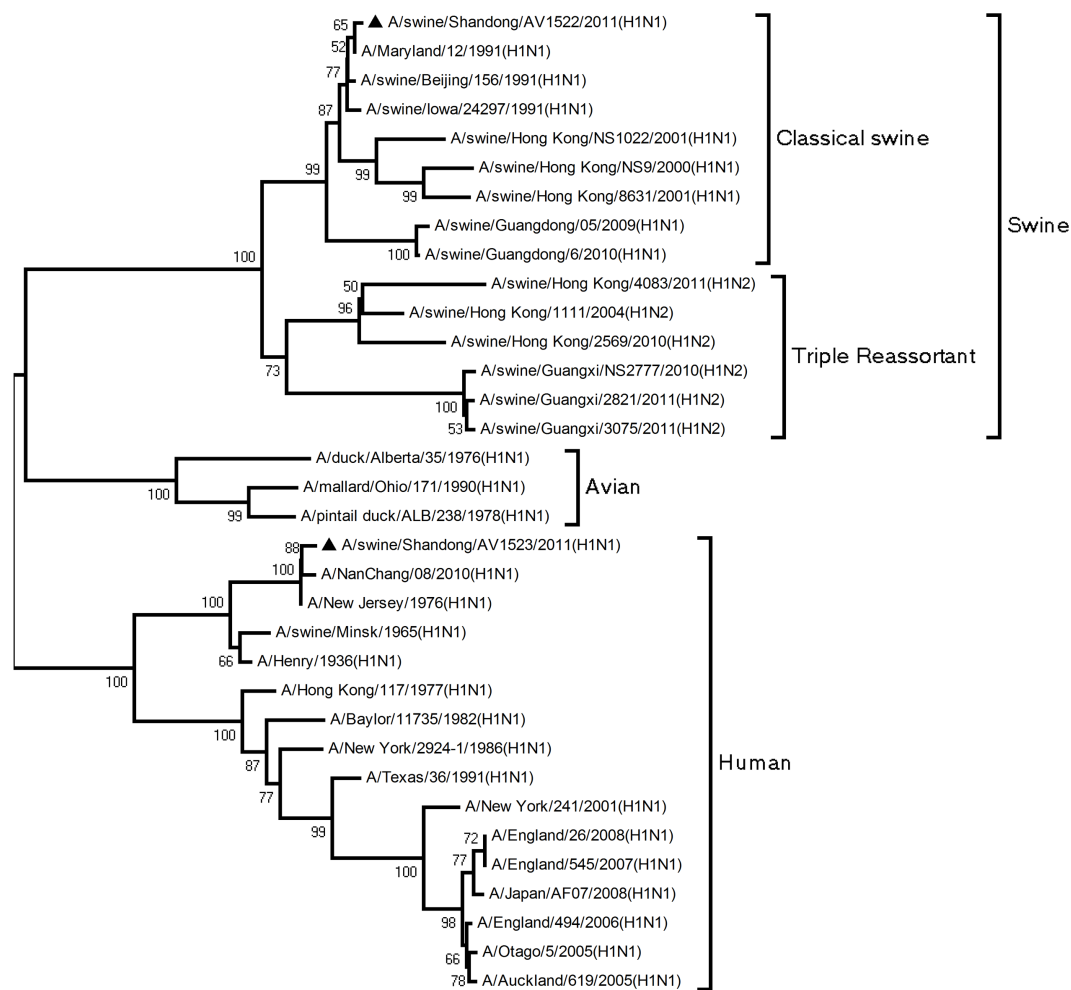

**Figure S1G**

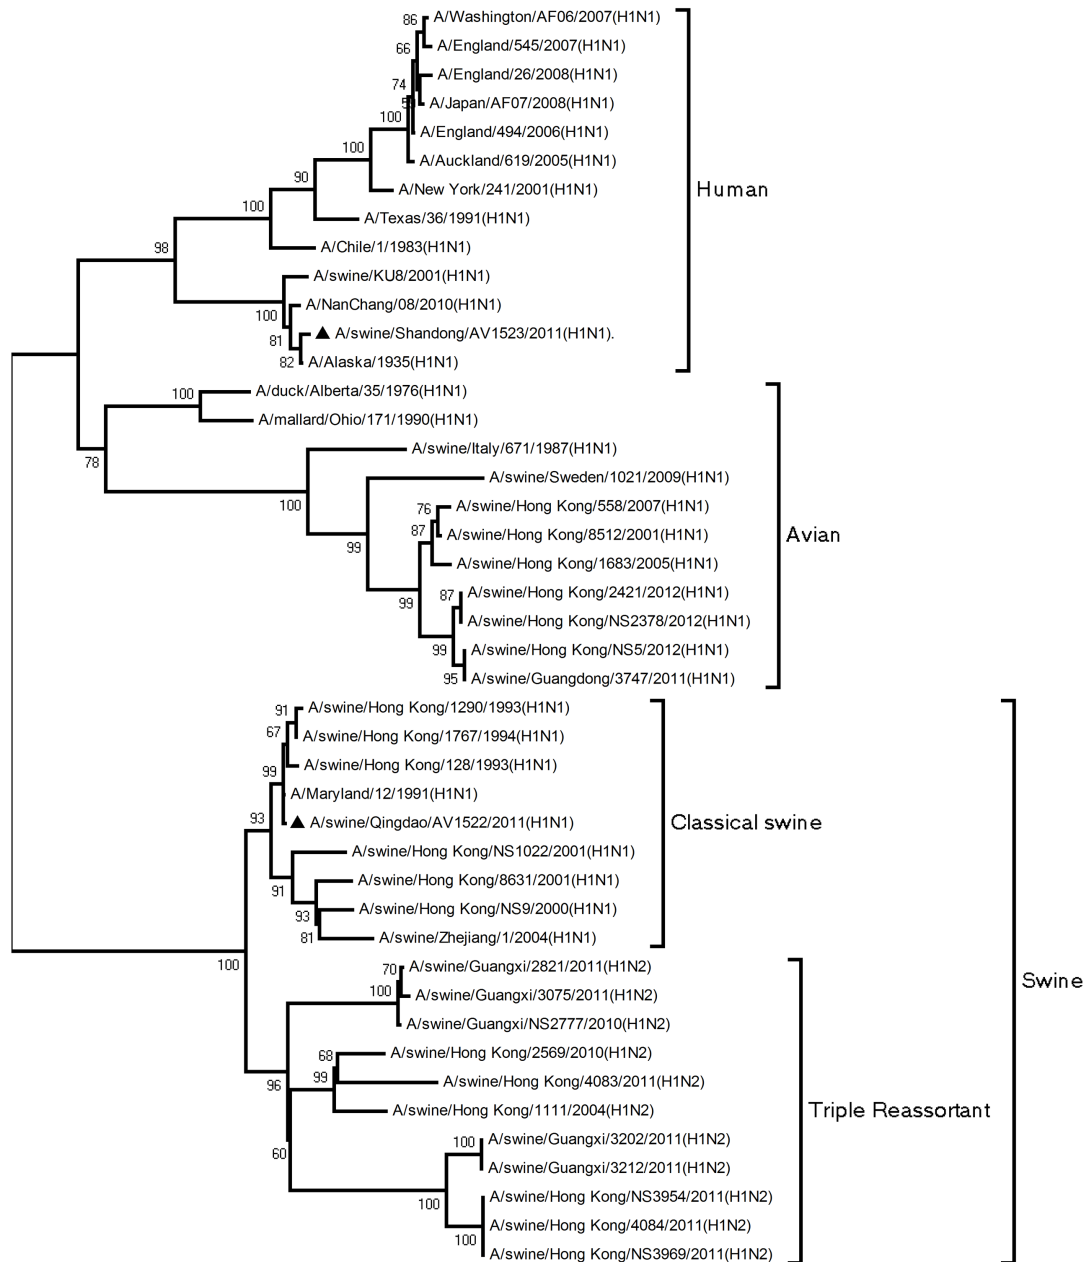

Supplement: s1 [file s1]
